# Supplementary material for: Development of a versatile synthesis method for trinuclear Co(iii), Rh(iii), and Ir(iii) dithiolene complexes, and their crystal structures and multi-step redox properties
Source: Royal Society of Chemistry journal article supplement (doi:10.1039/b815560g), 2009-01-01
Supplement: b815560g.pdf [file b815560g.pdf]

# Development of a versatile synthesis method for trinuclear Co(III), Rh(III), and Ir(III) dithiolene complexes, and their crystal structures and multi-step redox properties

Yusuke Shibata, Baohua Zhu, Shoko Kume, and Hiroshi Nishihara\*

## Supplementary Information

Cyclic voltammograms

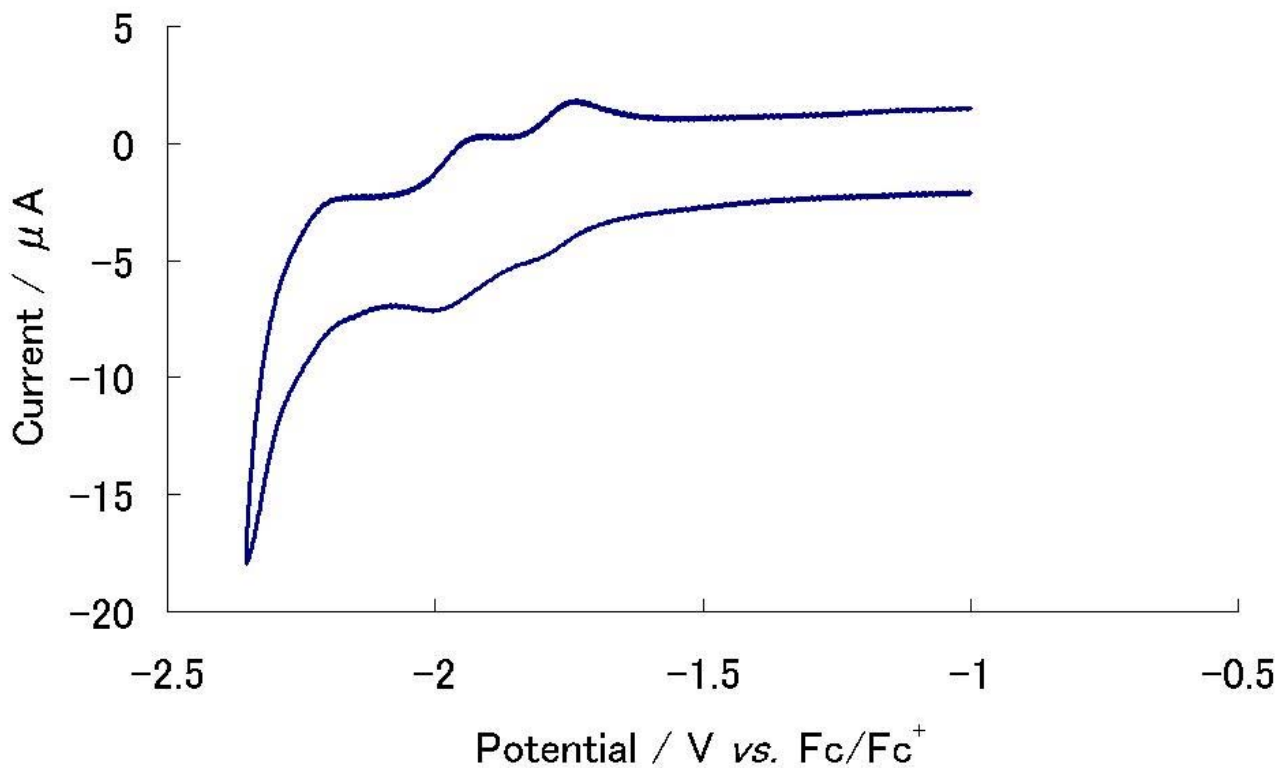

**Fig. S1.** Cyclic voltammogram of [Rh<sub>3</sub>(η<sup>5</sup>-C<sub>5</sub>Me<sub>5</sub>)<sub>3</sub>(S<sub>6</sub>C<sub>6</sub>)] (4) at a glassy carbon electrode in 0.1 mol dm<sup>-3</sup> Bu<sub>4</sub>NClO<sub>4</sub>-C<sub>6</sub>H<sub>5</sub>CN at 0.1 V s<sup>-1</sup>.

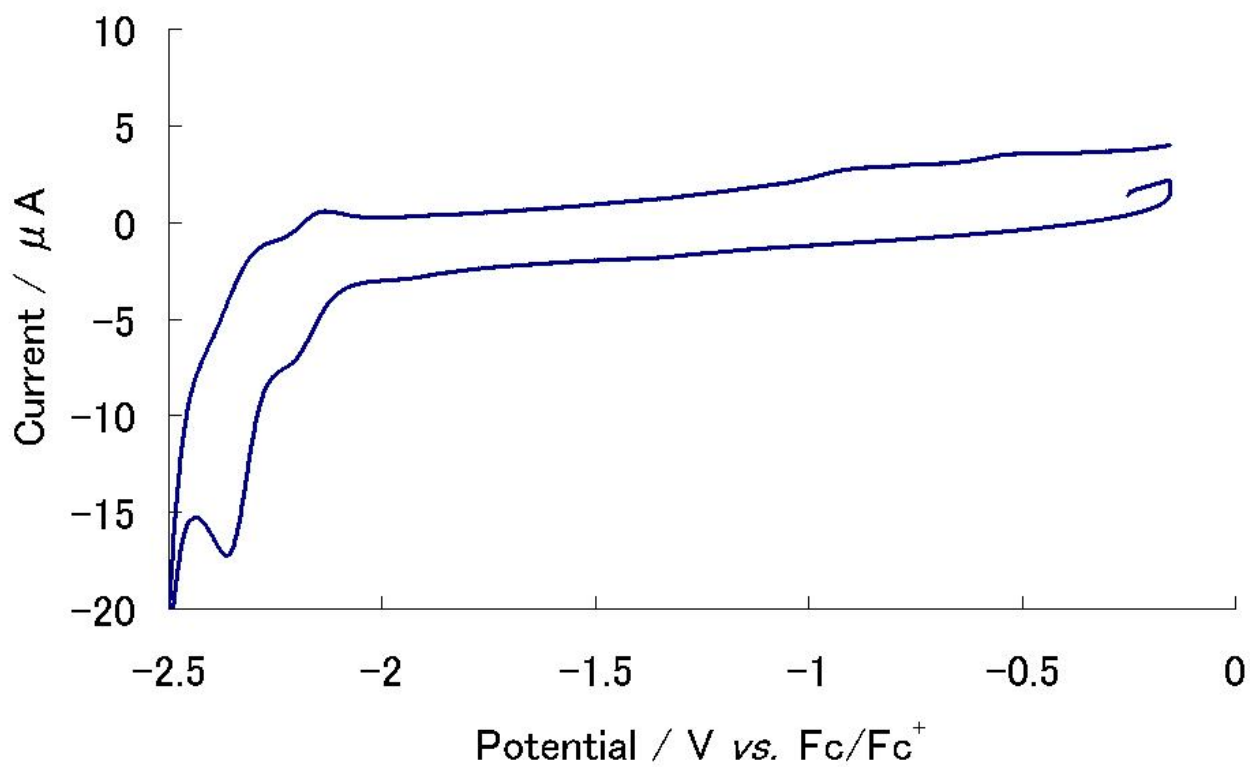

**Fig. S2.** Cyclic voltammogram of  $[\text{Ir}_3(\eta^5\text{-C}_5\text{Me}_5)_3(\text{S}_6\text{C}_6)]$  (**5**) at a glassy carbon electrode in  $0.1 \text{ mol dm}^{-3} \text{ Bu}_4\text{NClO}_4\text{-C}_6\text{H}_5\text{CN}$  at  $0.1 \text{ Vs}^{-1}$ .

X-ray crystal structures

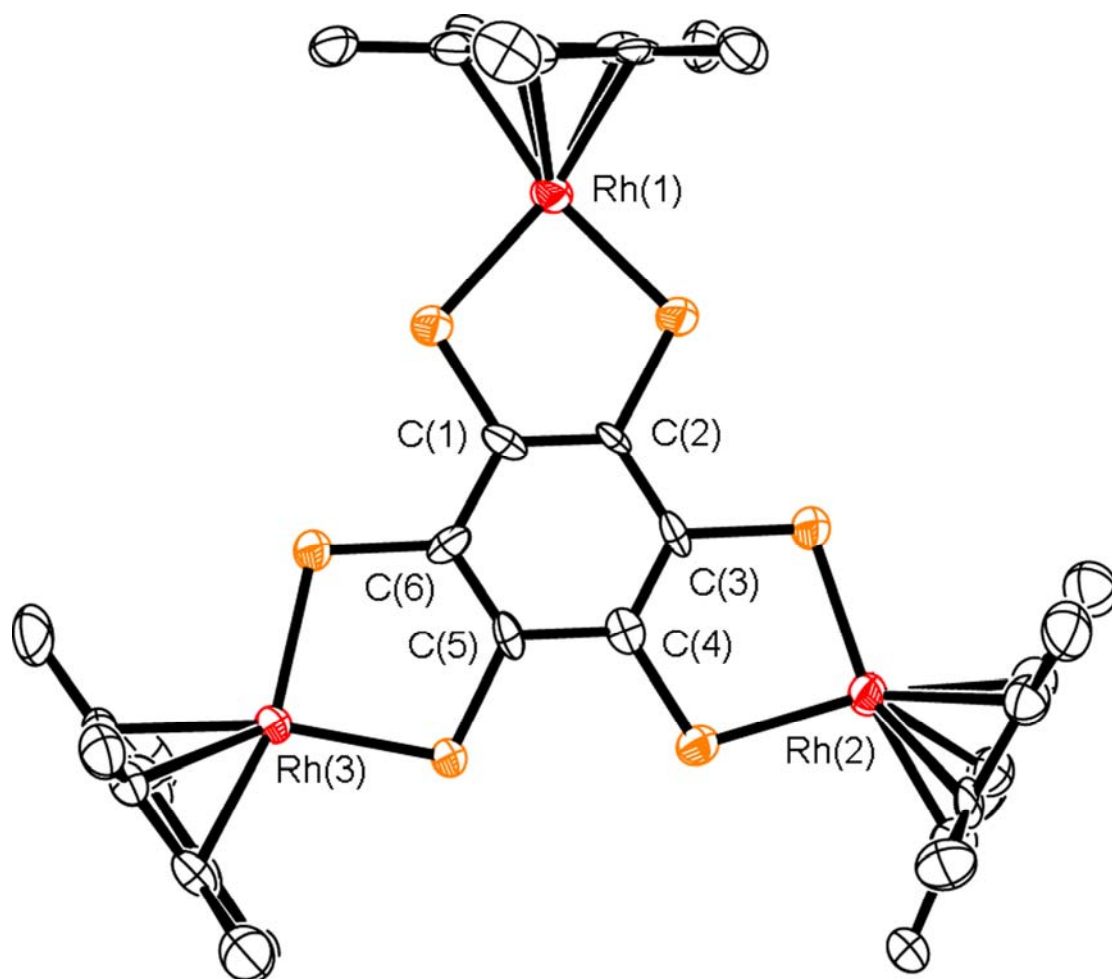

Fig. S3. X-ray crystal structure of **4**. H atoms and solvent molecules are omitted for clarity. Thermal ellipsoids are drawn at the 50 % level.

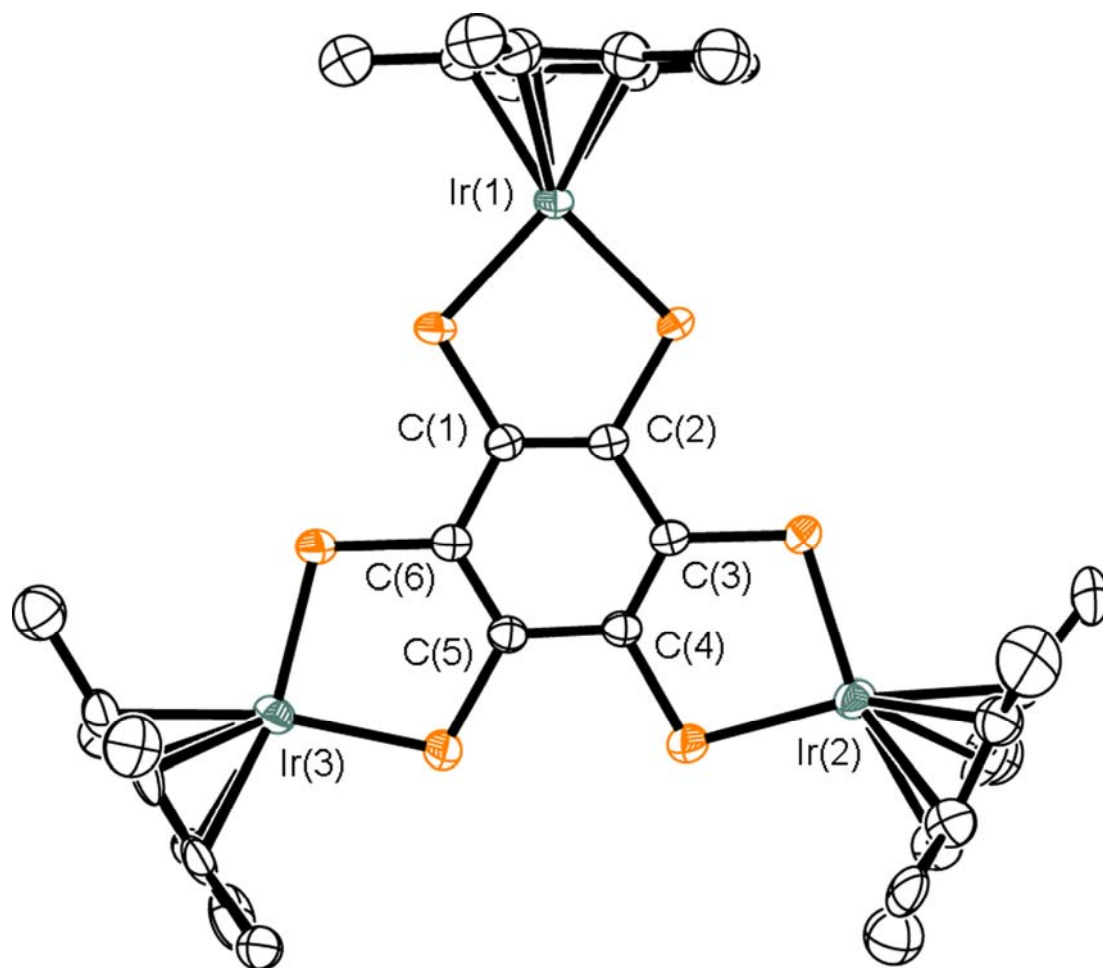

**Fig. S4.** X-ray crystal structure of **5**. H atoms are omitted for clarity. Thermal ellipsoids are drawn at the 50 % level.
